# Supplementary material for: Eight in One: Hidden Diversity of the Bagrid Catfish Tachysurus albomarginatus s.l. (Rendhal, 1928) Widespread in Lowlands of South China
Source: Front Genet. 2021 Nov 17;12:713793. doi: 10.3389/fgene.2021.713793 (PMC8635968; doi:10.3389/fgene.2021.713793)
Supplement: Supplementary file 1 [file Table2.XLSX]

## Sheet: Sheet1
Lineages	Haplotype	Genebank accession number
		cyt.b	CO1	RAG2
Lineage A	Hap10	MT363192	MT379954	MZ636389
	Hap58	MT363193	MT379955	MZ636390
	Hap20	MT363194	MT379956	MZ636391
	Hap48	MT363195	MT379957	MZ636392
	Hap24	MT363196	MT379958	MZ636393
	Hap27	MT363197	MT379959	MZ636394
	Hap25	MT363198	MT379960	MZ636395
	Hap26	MT363199	MT379961	MZ636396
	Hap37	MT363200	MT379962	MZ636397
	Hap57	MT363201	MT379963	MZ636398
	Hap12	MT363202	MT379964	MZ636399
	Hap13	MT363203	MT379965	MZ636400
Lineage B1	Hap46	MT363204	MT379966	MZ636401
	Hap47	MT363205	MT379967	MZ636402
	Hap15	MT363206	MT379968	MZ636403
	Hap14	MT363207	MT379969	MZ636404
	Hap16	MT363208	MT379970	MZ636405
	Hap9	MT363209	MT379971	MZ636406
	Hap60	MT363210	MT379972	MZ636407
	Hap54	MT363211	MT379973	MZ636408
	Hap45	MT363212	MT379974	MZ636409
Lineage B2	Hap6	MT363213	MT379975	MZ636410
	Hap44	MT363214	MT379976	MZ636411
	Hap8	MT363215	MT379977	MZ636433
	Hap19	MT363216	MT379978	MZ636412
	Hap18	MT363217	MT379979	MZ636413
	Hap7	MT363218	MT379980	MZ636414
Lineage C	Hap29	MT363219	MT379981	MZ636415
	Hap28	MT363220	MT379982	MZ636416
	Hap56	MT363221	MT379983	MZ636417
Lineage D1	Hap36	MT363222	MT379984	MZ636418
	Hap34	MT363223	MT379985	MZ636419
	Hap49	MT363224	MT379986	MZ636420
	Hap50	MT363225	MT379987	MZ636421
	Hap53	MT363226	MT379988	MZ636422
	Hap51	MT363227	MT379989	MZ636423
	Hap52	MT363228	MT379990	MZ636424
	Hap33	MT363229	MT379991	MZ636425
	Hap35	MT363230	MT379992	MZ636426
Lineage D2	Hap40	MT363231	MT379993	MZ636427
Lineage D3	Hap30	MT363232	MT379994	MZ636428
	Hap31	MT363233	MT379996	MZ636429
	Hap32	MT363234	MT379995	MZ636430
Lineage D4	Hap59	MT363235	MT379997	MZ636431
Lineage E	Hap41	MT379998	MT363236	MZ636380
	Hap43	MT379999	MT363237	MZ636381
	Hap23	MT380000	MT363238	MZ636382
	Hap22	MT380001	MT363239	MZ636383
	Hap21	MT380002	MT363240	MZ636384
	Hap38	MT380003	MT363241	MZ636385
	Hap42	MT380004	MT363242	MZ636386
	Hap11	MT380005	MT363243	MZ636432
	Hap17	MT380006	MT363244	MZ636387
	Hap55	MT380007	MT363245	MZ636388
Outgroups
Tachysurus fulvidraco		MZ636439	MZ636434	MZ636444
Tachysurus nutidus		MZ636440	MZ636435	MZ636445
Tachysurus truncatus		MZ636441	MZ636436	MZ636446
Tachysurus vachelli		MZ636442	MZ636437	MZ636447
Hemibagrus macropterus		MZ636443	MZ636438	MZ636448
